# Supplementary figures and images for: The Spectrum of Response to Erenumab in Patients With Episodic Migraine and Subgroup Analysis of Patients Achieving ≥50%, ≥75%, and 100% Response
Source: PubMed Central journal article supplement — Headache. 2020 Aug 26;60(9):2026–40. doi: 10.1111/head.13929 (PMC7590156; doi:10.1111/head.13929), 2020-08-26

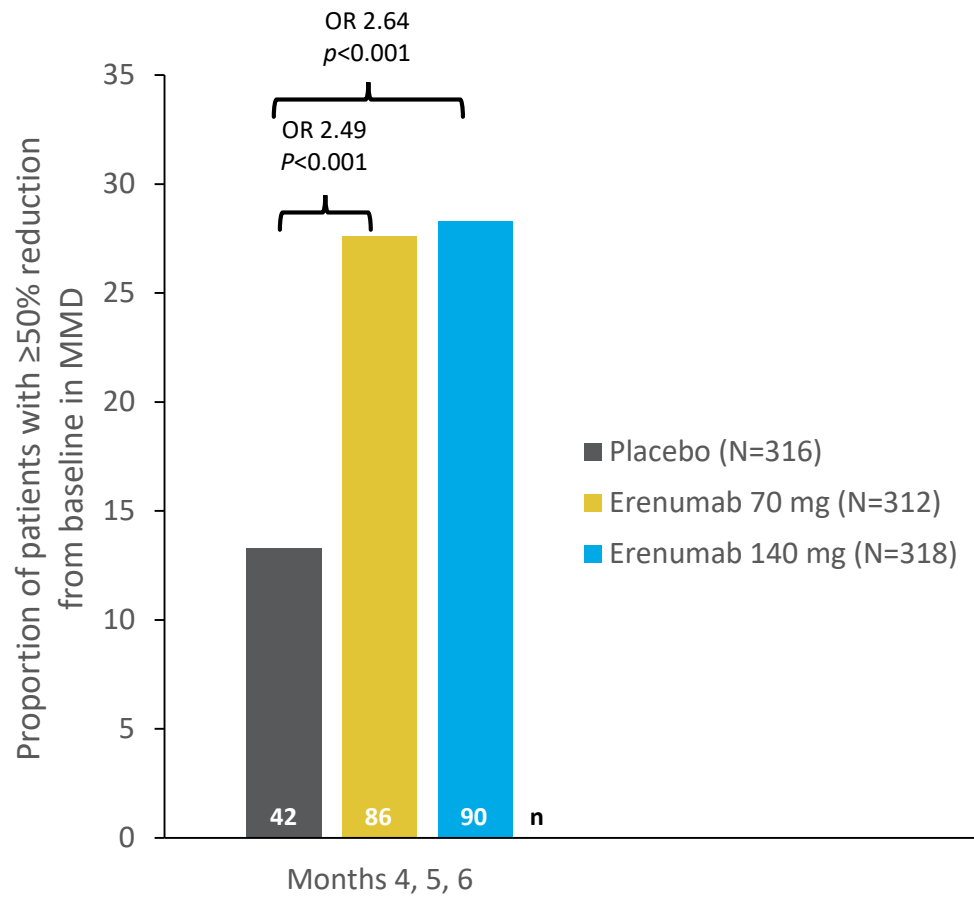

Supplement: HEAD-60-2026-s001.pdf [file HEAD-60-2026-s001.pdf]

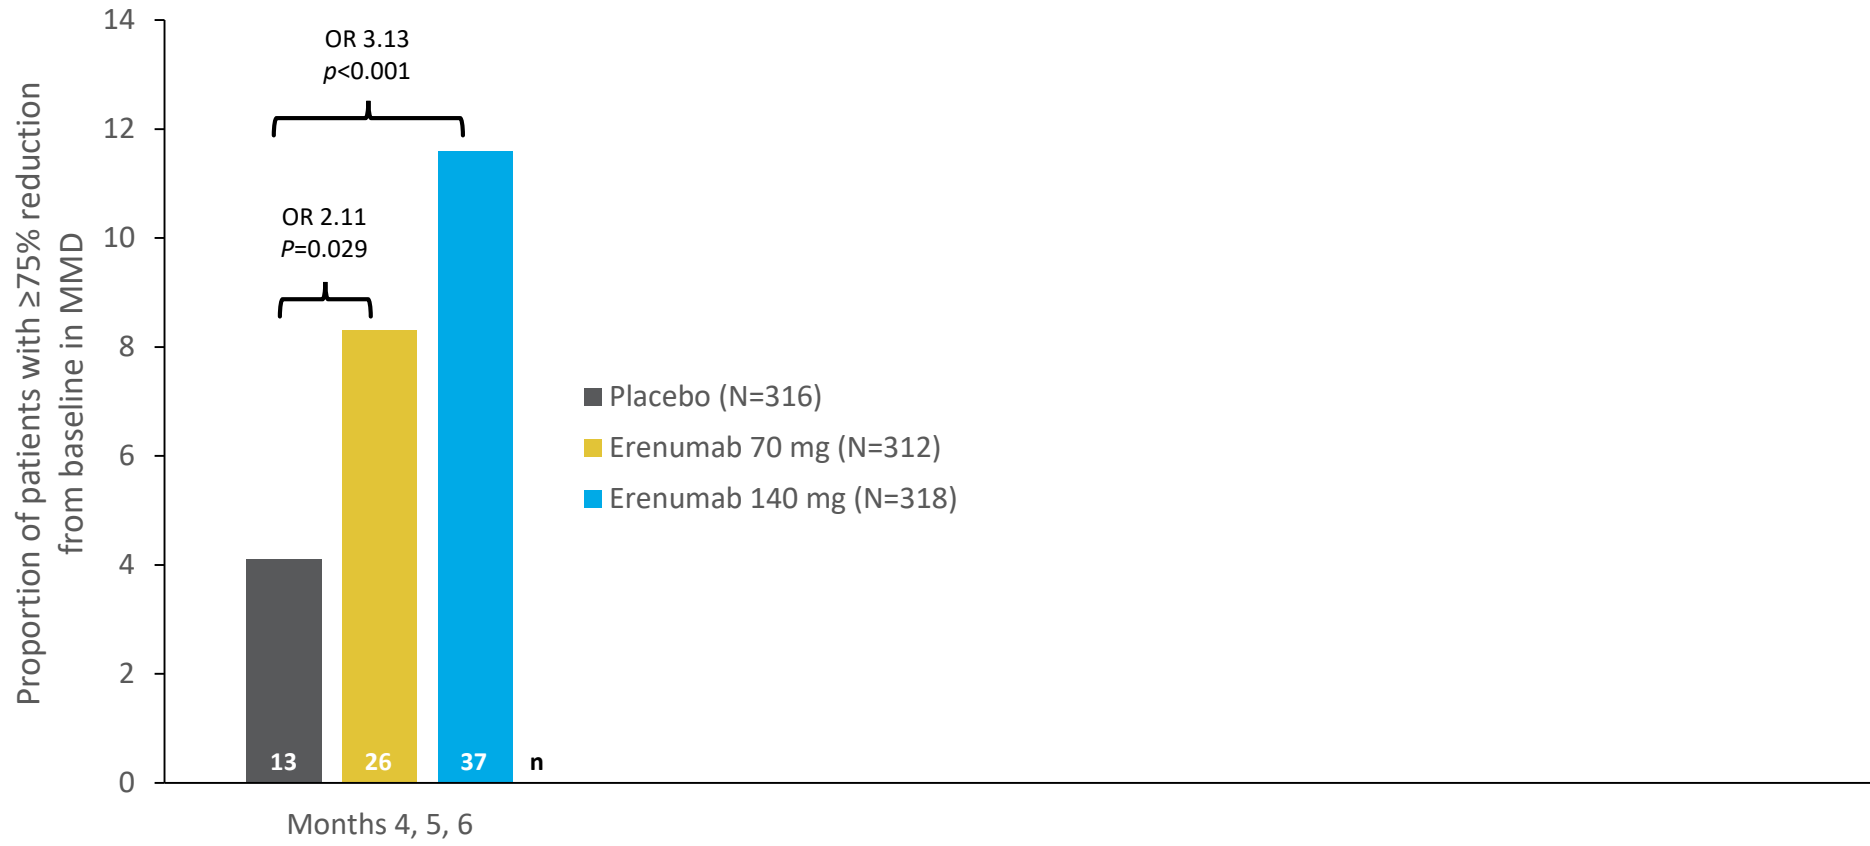

Supplement: HEAD-60-2026-s002.pdf [file HEAD-60-2026-s002.pdf]

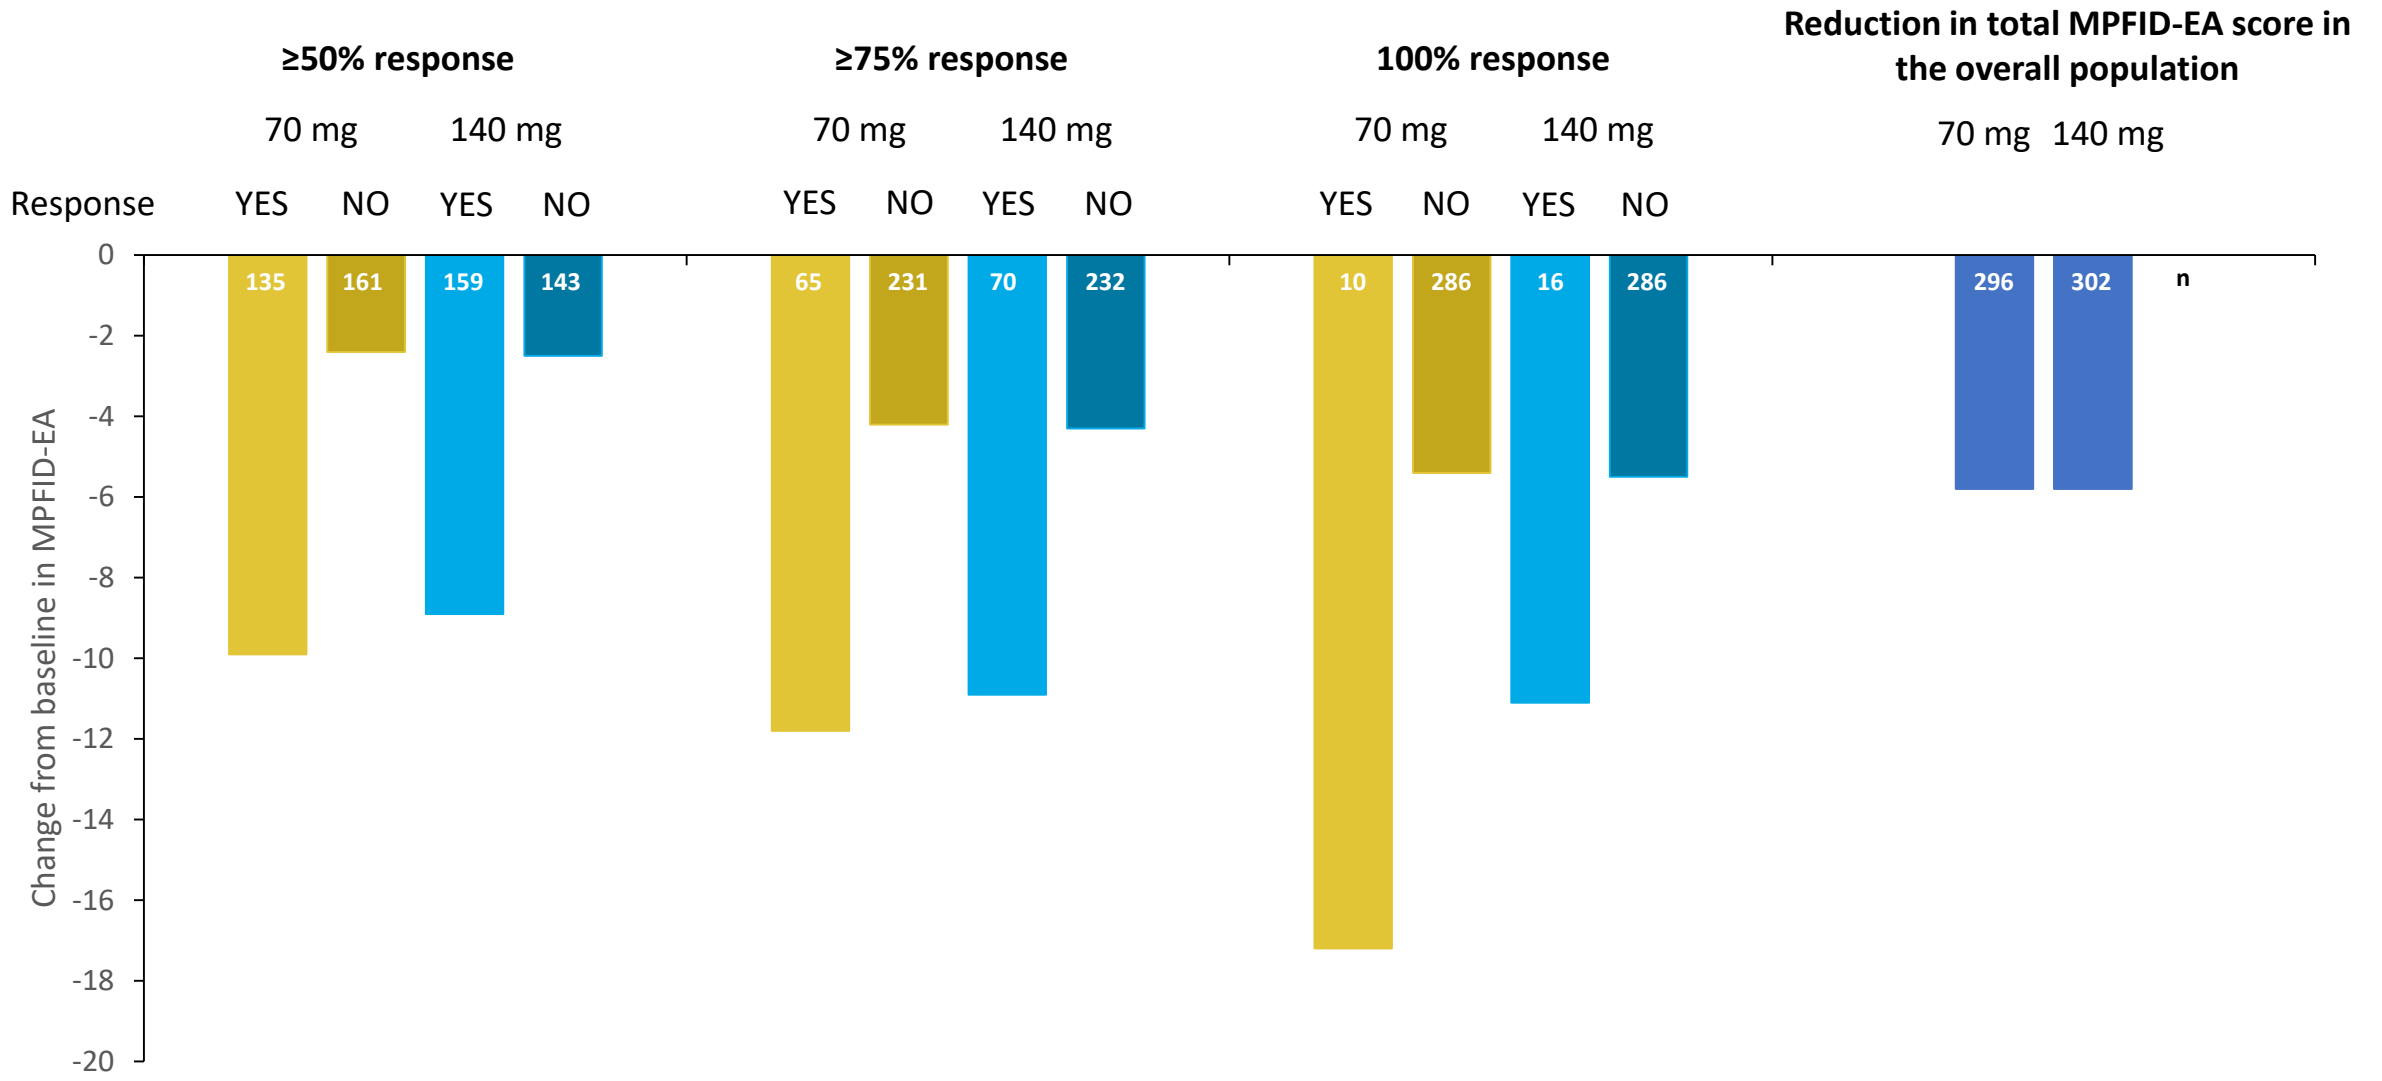

Supplement: HEAD-60-2026-s003.pdf [file HEAD-60-2026-s003.pdf]

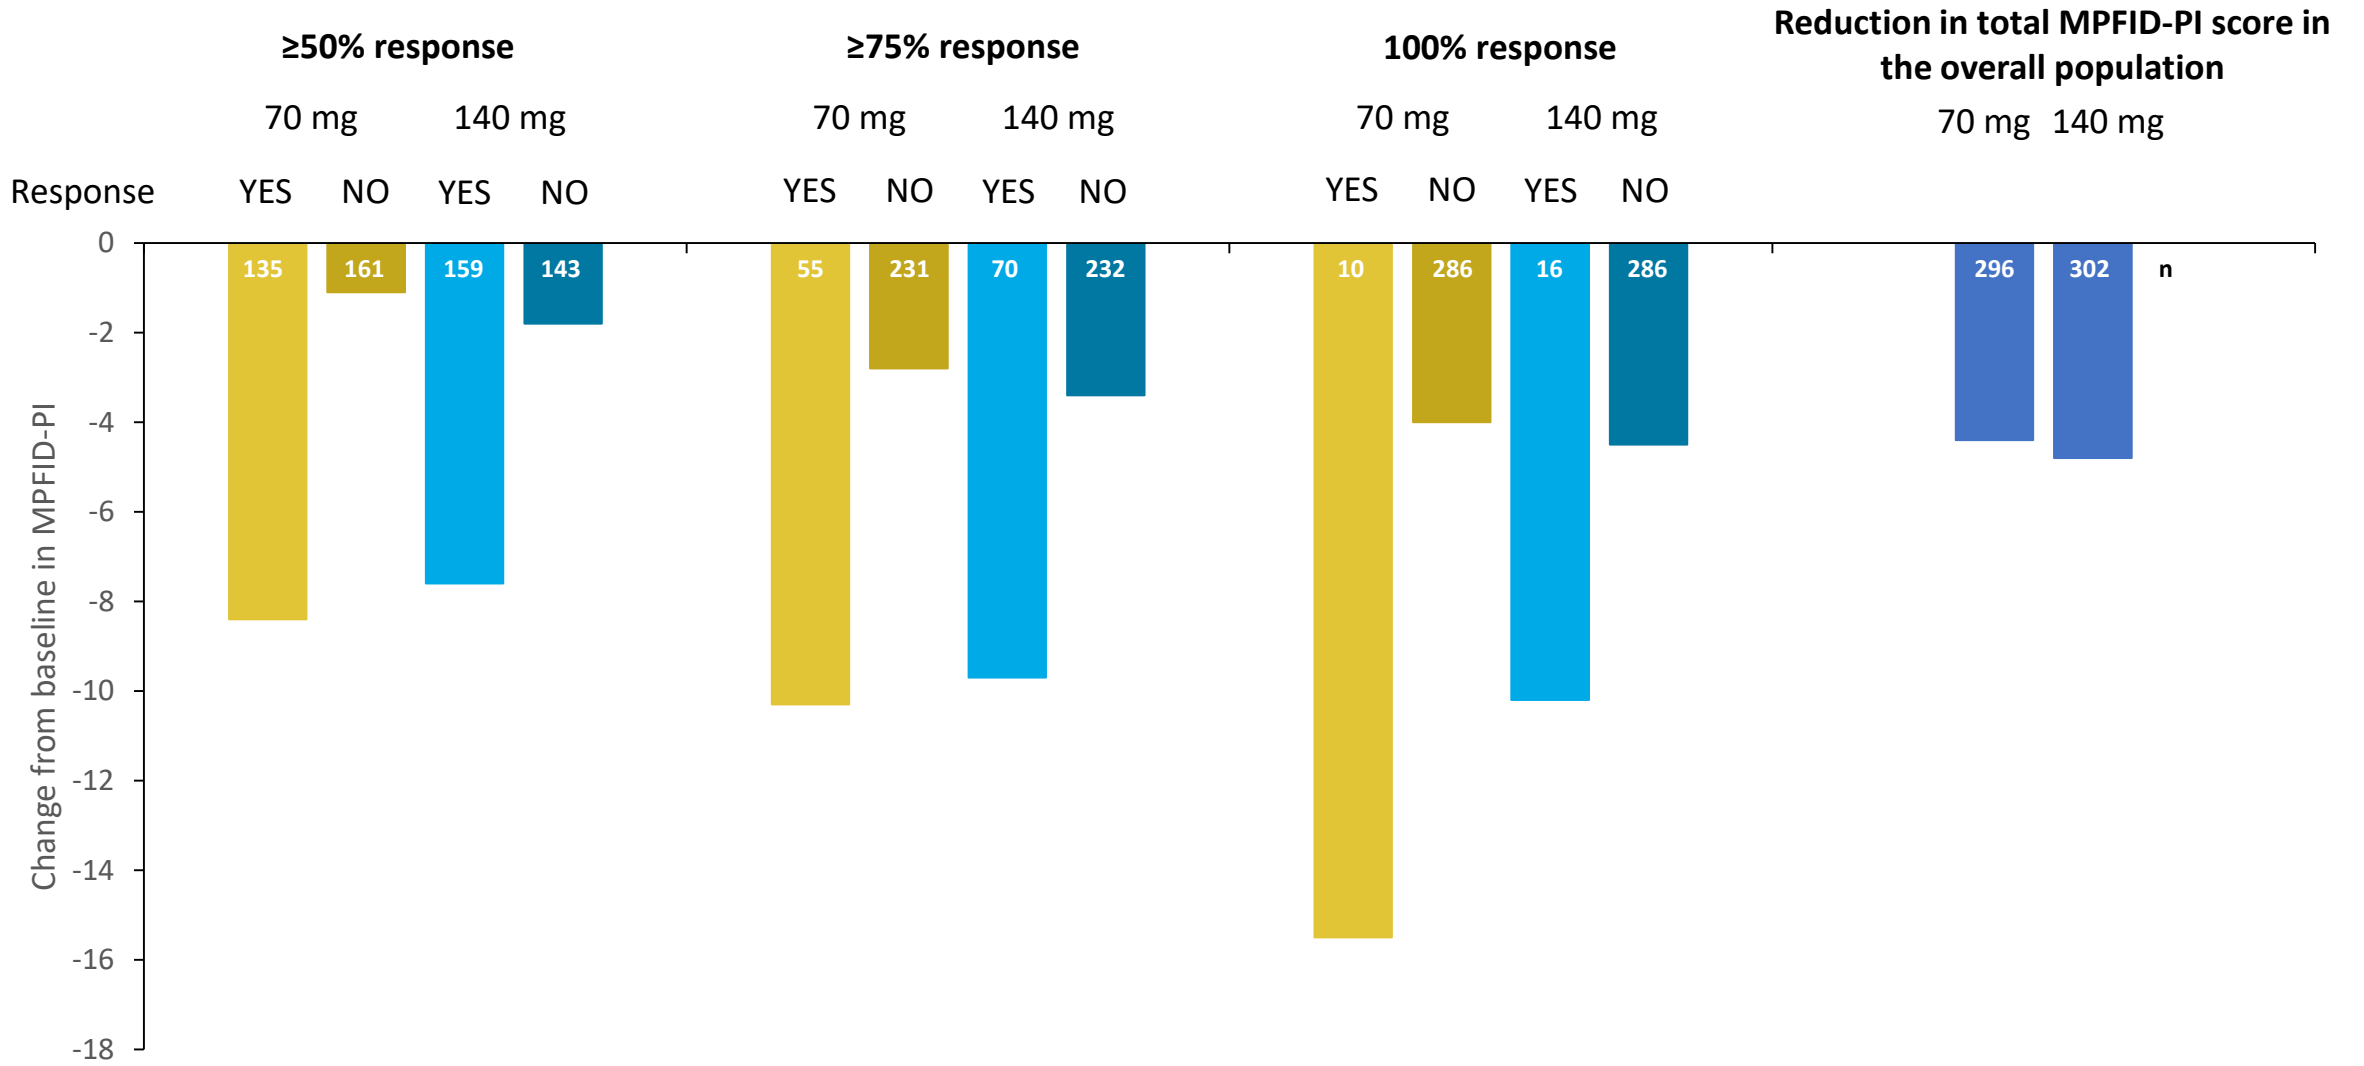

Supplement: HEAD-60-2026-s004.pdf [file HEAD-60-2026-s004.pdf]
